# Supplementary material
Source: Elsevier journal article supplement (https://www.sciencedirect.com/science/article/pii/S0213911115000060)
Supplement: mmc1 [file S0213911115000060:mmc1.doc]

**Table 1of online annex: Response rate of main variables**

|  | **N** | **%** | **N** | **%** | **N** | **%** |
| --- | --- | --- | --- | --- | --- | --- |
|  | **Total** | | **Online** | | **Centres** | |
| **Sociodemographic characteristics** | **1578** | | **1337** | | **241** | |
| Age group | 1578 | 100 | 1337 | 100 | 241 | 100 |
| Country of birth | 1561 | 99 | 1321 | 99 | 240 | 100 |
| Spanish region of residence | 1543 | 98 | 1302 | 97 | 241 | 100 |
| Type of residence (urban or rural) | 1541 | 98 | 1300 | 97 | 241 | 100 |
| Education | 1535 | 97 | 1296 | 97 | 239 | 99 |
| Occupation | 1526 | 97 | 1285 | 96 | 241 | 100 |
| Sexual orientation | 1515 | 96 | 1274 | 95 | 241 | 100 |
| Where to find sexual partners | 1383 | 88 | 1146 | 86 | 237 | 98 |
| Preferred web sites | 1239 | 79 | 1056 | 79 | 183 | 76 |
| **STI/HIV history** | **1578** | | **1337** | | **241** | |
| Self-reported previous STI | 1216 | 77 | 977 | 73 | 239 | 99 |
| Self-reported previous HIV test performed | 1027 | 65 | 794 | 59 | 233 | 97 |
| Self-reported last time HIV test performed | 708 | 45 | 485 | 36 | 223 | 93 |
| Known HIV status | 710 | 45 | 480 | 36 | 230 | 95 |
| **Previous STI/HIV** | **398** | | **233** | | **165** | |
| Notified an STI/HIV to sexual partners | 330 | 83 | 168 | 72 | 162 | 98 |
| Method used to notify | 314 | 79 | 161 | 69 | 153 | 93 |
| **Notified only some partners or did NOT notify an STI/HIV exposure** | **179** | | **91** | | **88** | |
| Main reasons for NOT having notified an STI/HIV exposure | 175 | 98 | 89 | 98 | 86 | 98 |
| **Use of web page** | **1578** | | **1337** | | **241** | |
| Intention to use a web page | 1134 | 72 | 900 | 67 | 234 | 97 |
| Type of web page used to notify sexual partners | 678 | 43 | 542 | 41 | 136 | 56 |
| Characteristics of the web page used to notify sexual partners | 618 | 39 | 482 | 36 | 136 | 56 |
| **Intention to notify sexual partners of an STI exposure** | **1578** | | **1337** | | **241** | |
| Intention to notify a STABLE partner | 1192 | 76 | 958 | 72 | 234 | 97 |
| Preferred method of notifying a STABLE partner | 1158 | 73 | 928 | 69 | 230 | 95 |
| Intention to notify a CASUAL partner | 1146 | 73 | 913 | 68 | 233 | 97 |
| Preferred method of notifying a CASUAL partner | 1116 | 71 | 887 | 66 | 229 | 95 |
| **NOT intending to notify a STABLE partner of an STI exposure** | **173** | | **155** | | **18** | |
| Main reasons for NOT intending to notify a STABLE partner of an STI | 158 | 91 | 144 | 93 | 14 | 78 |
| **NOT intending to notify a CASUAL partner of an STI exposure** | **459** | | **399** | | **60** | |
| Main reasons for NOT intending to notify a CASUAL partner of an STI | 439 | 96 | 379 | 95 | 60 | 100 |
| **Intention to notify sexual partners of an HIV exposure** | **1578** | | **1337** | | **241** | |
| Intention to notify a STABLE partner of an HIV exposure | 1012 | 64 | 779 | 58 | 233 | 97 |
| Preferred method of notifying a STABLE partner of an HIV exposure | 981 | 62 | 751 | 56 | 230 | 95 |
| Intention to notify a CASUAL partner of an HIV exposure | 953 | 60 | 725 | 54 | 228 | 95 |
| Preferred method of notifying a CASUAL partner of an HIV exposure | 931 | 59 | 709 | 53 | 222 | 92 |
| **NOT intending to notify a STABLE partner of an HIV exposure** | **61** | | **51** | | **10** | |
| Main reasons for NOT intending to notify a STABLE partner of an HIV exposure | 54 | 89 | 44 | 86 | 10 | 100 |
| **NOT intending to notify a CASUAL partner of an HIV exposure** | **259** | | **198** | | **61** | |
| Main reasons for NOT intending to notify a CASUAL partner of an HIV exposure | 253 | 98 | 193 | 97 | 60 | 98 |
